# Supplementary material
Source: publisher figshare collection journal article supplement (https://acs.figshare.com/ndownloader/files/20779845)
Supplement: Supplementary file 1 [file 20779845]

## Supporting Information

# Human Umbilical Cord Wharton's Jelly-Derived Mesenchymal Stem Cells Labeled with $\text{Mn}^{2+}$ and $\text{Gd}^{3+}$ Co-Doped $\text{CuInS}_2\text{-ZnS}$ Nanocrystals for Multimodality Imaging in a Tumor Mice Model

*Shashank Shankar Chetty<sup>a</sup>, Selvarasu Praneetha<sup>a</sup>, Arumugam Vadivel Murugan<sup>a\*</sup>, Kavitha Govarthanan<sup>b</sup>, Rama Shanker Verma<sup>b\*</sup>*

*<sup>a</sup>Advanced Functional Nanostructured Materials Laboratory, Centre for Nanoscience and Technology, Madanjeet School of Green Energy Technologies, Pondicherry University (A Central University), Puducherry-605014, India.*

*<sup>b</sup>Stem Cell and Molecular Biology Laboratory, Bhupat and Jyoti Mehta School of Biosciences, Department of Biotechnology, Indian Institute of Technology-Madras (IIT-M), Chennai-600036, India.*

**Keywords:** *multi-modality imaging,  $\text{CuInS}_2\text{-ZnS}$ , microwave refluxing, stem cell labeling, in vivo tracking.*

Corresponding Author \*E-mail:avmrajeshwar@gmail.com, avmurugan.nst@pondiuni.edu.in.  
Tel. +91-413-2654975.

\*E-mail: vermars@iitm.ac.in, Tel. + 91-44-2257-4109

## **S1. Phase transformation protocol *via* ligand exchange**

Briefly, 50 mg of MUA was dissolved in 0.5 mL of methanol and pH was adjusted to 12 using TMAH under continuous stirring. The transparent MUA-methanol mixture was added dropwise to 5 mL of MW-R synthesized DDT-functionalized NCs in chloroform and stirred at 70 °C for 30 min. Subsequently, 5 mL of PBS buffer was added and stirred for 20 min. The resultant solution separated into two phases, upper phase containing water soluble MUA-functionalized NCs in PBS and lower phase containing DDT ligands in chloroform. The MUA-functionalized NCs in PBS was stored at room temperature for further characterizations.

## **S2. Induced differentiation of WJ-MSCs and histological staining**

**Adipocyte differentiation:** The CIS-ZMGS NCs labeled WJ-MSCs were supplemented with the induction medium comprising dexamethasone (1  $\mu$ M), isobutylmethylxanthine (0.5 mM), insulin (10  $\mu$ g/mL), indomethacin (200  $\mu$ M) for 14 days and examined by labeling lipid droplets using Oil Red O.

**Osteocyte differentiation:** The CIS-ZMGS NCs labeled WJ-MSCs were supplemented with the induction medium comprising of L-ascorbic acid 2-phosphate (0.2 mM), dexamethasone (1  $\mu$ M), and  $\beta$ -glycerol phosphate (10 mM) for 14 days and visualized by staining mineral depositions using alizarin red.

**Chondrocyte differentiation:** The CIS-ZMGS NCs labeled WJ-MSCs were supplemented with the induction medium comprising of BSA (1.25 mg/mL), insulin (6.25  $\mu$ g/mL), transferrin (6.25 g/mL), transforming growth factor (10 ng/mL), selenous acid (6.25 g/mL), dexamethasone (100 nM), L-ascorbic acid (0.1 mM), proline (0.35 mM), linolenic acid (5.33 mg/mL) and sodium pyruvate (1mM) for 28 days and imaged by staining glycosaminoglycan using toluidine blue.

### S3. Histopathology, ICP-MS, immuno-fluorescence and hematology analysis

After 6 h post-transplantation of CIS-ZMGS NCs labeled WJ-MSCs, all the major organs (liver, lungs, spleen, heart and kidney) were excised from tumor-bearing C57BL/6 mice and embedded in paraffin for developing thin sections. The sections were stained with haematoxylin and eosin for histopathological studies. For ICP-MS analysis, tissue organs were pre-digested using nitric acid method and the concentrations of Cu (copper) was determined by Teledyne Leeman, Prodigy XP. For immuno-fluorescence assay, the thin section of excised tumor was fixed with 2% PFA and blocked using 3% BSA at room temperature for 1 h.<sup>59</sup> The sections were primarily conjugated using anti-human nuclei (1:100, HuNu; Millipore, US) for 12 h at 4 °C and secondary labeled with goat anti-mouse IgG conjugated with fluorescent Cy3 (1:500, Invitrogen, US) in dark for 2 h. The tumor sections were gently rinsed with DPBSA after staining using Hoechst (1  $\mu$ M) for 5 min and imaged under fluorescence microscope (Nikon Ti-E, Japan). For hematology investigation, blood samples were harvested and analysed for whole blood count, lipid profiles, bio-chemical levels, liver and kidney function tests by automated analyzer (Mindray, China).

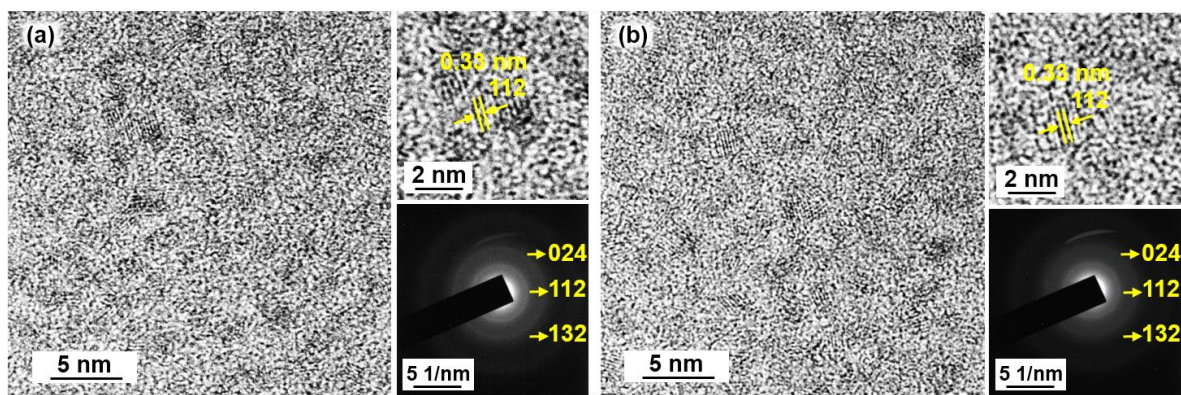

**Figure S1.** HR-TEM images of (a) Mn<sup>2+</sup> and (b) Gd<sup>3+</sup> doped CuInS<sub>2</sub>-ZnS NCs. [Inset: Higher magnification and SAED pattern, respectively]

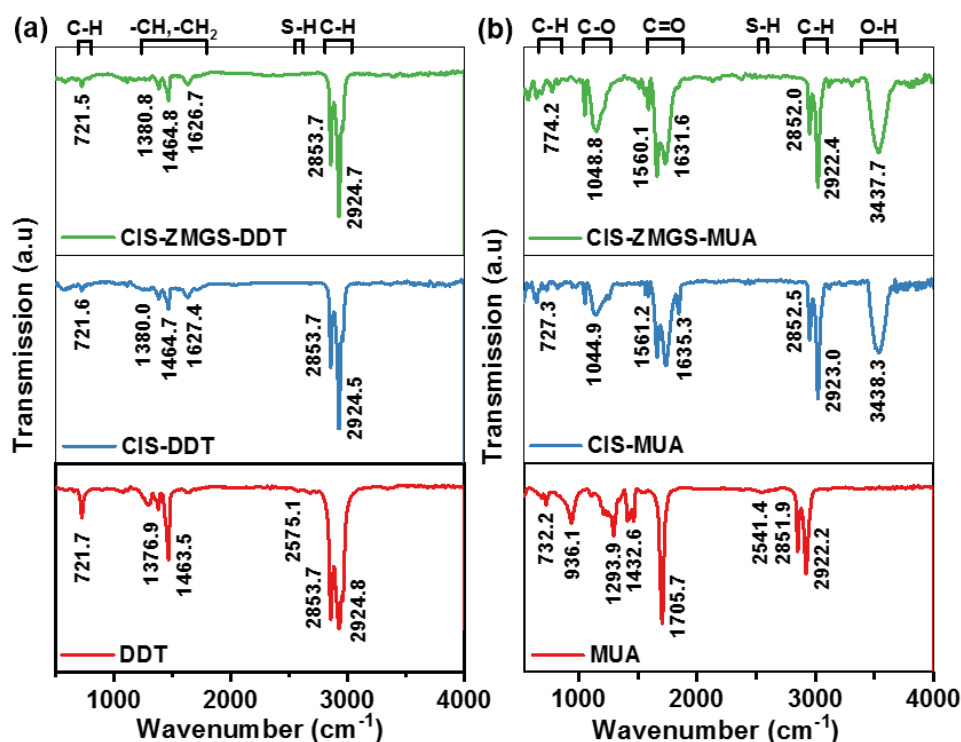

**Figure S2.** FT-IR spectra of (a) DDT- and (b) MUA-functionalized NCs before and after phase transformation, respectively.

Functionalization of ligands on the surface of NCs play crucial role reinforcing structural defects and optical properties of synthesized NCs. The FT-IR spectra DDT-fucntionalized NCs exhibited characteristics peaks around 2853.7 and 2924.8  $\text{cm}^{-1}$ , assigned to symmetric and asymmetric  $\text{CH}_2$  and  $\text{CH}_3$  stretching modes, respectively. The vibrational peak at 1464.7, 1463.5  $\text{cm}^{-1}$  and a feeble peak at  $\sim 1380.0$   $\text{cm}^{-1}$  are ascribed to deformed vibration of  $-\text{CH}_2$  and C-H stretching, respectively. In particular, the absence of characteristic peak at 2575.1  $\text{cm}^{-1}$  due to S-H stretching clearly corroborated the coordination of DDT ligands on NCs surface during MW-R synthesis. After phase transformation, the MUA-functionalized NCs in water exhibited vibrational peaks around 2852.0 and 2922.4  $\text{cm}^{-1}$ , assigned to symmetric and asymmetric  $\text{CH}_2$  and  $\text{CH}_3$  stretching modes, respectively. The characteristics peak around 1048.4, 1560.1, 1631.6  $\text{cm}^{-1}$  are ascribed to carboxyl ( $-\text{COOH}$ ) group. In addition, the absence of vibration peak 2541.4  $\text{cm}^{-1}$  due to S-H

stretching confirmed the substitutive ligand exchange of DDT over MUA ligand on NCs surface. Interestingly, ligand exchange mechanism using MUA involves two functional groups *i.e.* thiols (S-H) and carboxyl (-COOH). During phase transformation process in alkaline pH, the functional groups are deprotonated and thus, cations ( $\text{Cu}^+$ ,  $\text{Zn}^{2+}$ ) on NCs surface exhibit enhance binding affinity with thiols than carboxyl group that spatially orient outward to adjust the pH of solution above pKa, thereby dispersing NCs in water.

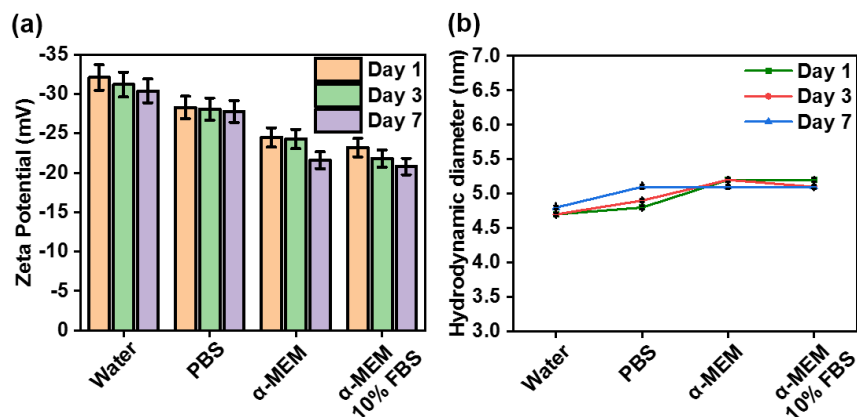

**Figure S3.** Time-dependent changes (a) Zeta potential and (b) hydrodynamic diameter of MUA-functionalized CIS-ZMGS NCs in different physiological conditions.

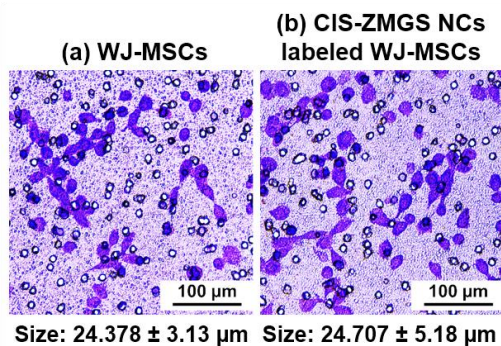

**Figure S4.** Crystal violet staining of (a) WJ-MSCs and (b) CIS-ZMGS NCs labeled WJ-MSCs for cell size measurement.

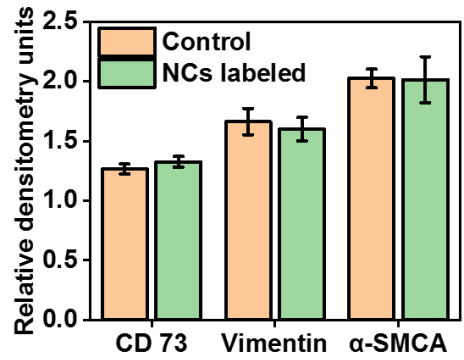

**Figure S5.** Quantitative analysis of proteins (CD73, Vimentin, α-SMCA) expression by western blot technique.

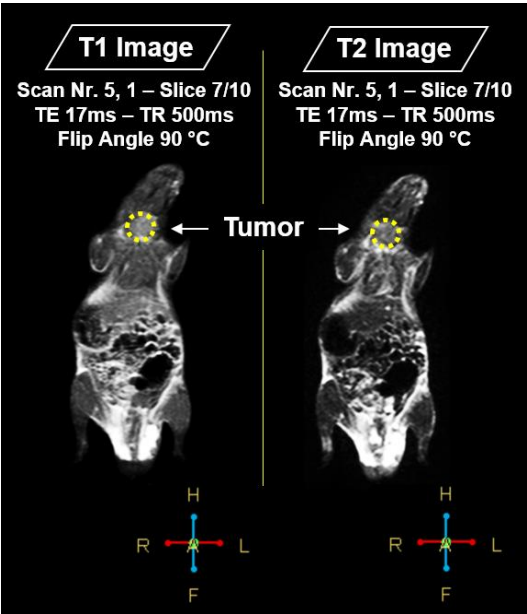

**Figure S6.** *In vivo* T<sub>1</sub>-weighted (left) and T<sub>2</sub>-weighted (right) MR imaging of control B16F10 tumor-bearing C57BL/6 mice.

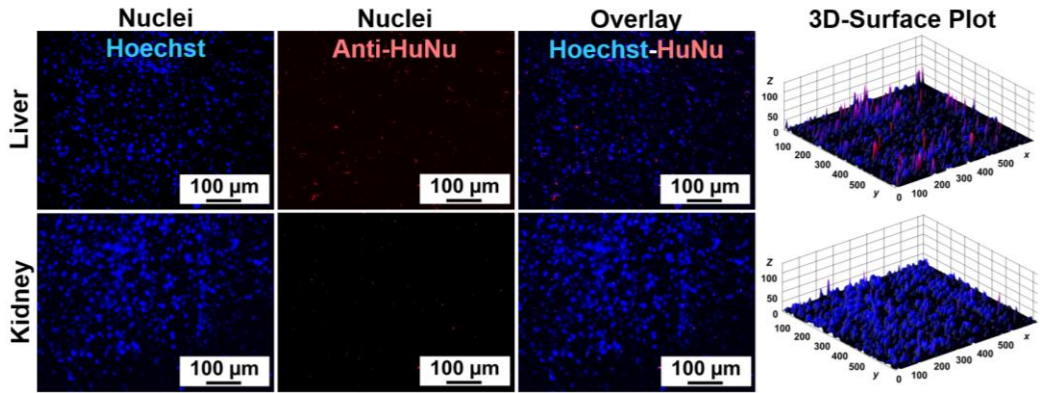

**Figure S7.** Immuno-fluorescence labeling of excised liver (above) and kidney (below) tissues with Hoechst dye (blue) and anti-HuNu antibody (red).

**Table S1.** Elemental quantification of MW-R synthesized CIS-ZMGS NCs by XPS analysis

| Peak                     | Cu 2p | In 3d | S 2p  | Zn 2p | Mn 2p | Gd 3d | C 1s  | O 1s |
|--------------------------|-------|-------|-------|-------|-------|-------|-------|------|
| Atomic Concentration (%) | 1.21  | 4.92  | 20.35 | 8.03  | 1.69  | 1.07  | 56.92 | 5.82 |

**Table S2.** List of primer sequences for RT-PCR analysis of differentiated MSCs.

| Gene Name          | Primer Detail                                                            |
|--------------------|--------------------------------------------------------------------------|
| <b>CEBP A</b>      | FP-5' AAGAAGTCGGTGGACAAGAACAG 3'<br>RP-5' TGCGCACCGCGATGT 3'             |
| <b>CEBP B</b>      | FP- 5' GCAAGAGCCGCGACAAG 3'<br>RP- 5' GGCTCGGGCAGCTGCTT 3'               |
| <b>PPAR G</b>      | FP- 5' AGGCGAGGGCGATCTTGACAG 3'<br>RP- 5' GATGCGGATGGCCACCTCTTT 3'       |
| <b>FABP 4</b>      | FP-5' GCTTTGCCACCAGGAAAGTG 3'<br>RP-5' ATGGACGCATTCCACCACCA 3'           |
| <b>Collagen I</b>  | FP-5' GGCCATCCAGCTGACCTTCC 3'<br>RP-5' CGTGCAGCCATCGACAGTGAC 3'          |
| <b>Collagen II</b> | FP-5' TGAACGAGGTTTCCCAGGTG 3'<br>RP-5' CCAGGCATTCCCTGAAGACC 3'           |
| <b>Runx2</b>       | FP-5' GCGGTGCAAACCTTTCTCCAG3'<br>RP-5' TCACTGTGCTGAAGAGGCTG 3'           |
| <b>Opn</b>         | FP-5' TTGCAGCCTTCTCAGCCAA 3'<br>RP- 5' GGAGGCAAAAGCAAATCACTG 3'          |
| <b>Sox9</b>        | FP-5' AGCACTCATAATATGGCATCCTTCA 3'<br>RP- 5' AGGTAAGTTTCACGGAGAGAACAA 3' |
